# Supplementary material for: Virtual Reality vs Traditional Videogames: Which is More Effective at Enhancing Adolescent Intentions and Attitudes Towards Sport?
Source: Research Square preprint supplement (doi:10.21203/rs.3.rs-7049862/v1), 2025-07-11
Supplement: Supplementary file 1 [file 8ad99d5e410cf782a6cbf58b.docx]

**Virtual Reality vs Traditional Videogames: Which is More Effective at Enhancing Adolescent Intentions and Attitudes Towards Sport?**

**Appendix**

_______________________________________________________________________________________

| Table 2. LMMs for Attitudes Towards Sport Across Each Design | | | | | | | | | | | |
| --- | --- | --- | --- | --- | --- | --- | --- | --- | --- | --- | --- |
|  | **Design One: Baseball** | | |  | **Design Two: Golf** | | |  | **Design Three: Tennis** | | |
|  | Baseball | Favourite | Any |  | Baseball | Favourite | Any |  | Baseball | Favourite | Any |
| ***Group*** |  |  |  |  |  |  |  |  |  |  |  |
| VR - Con | -0.32 | -0.33 | -0.88 |  | -0.18 | 0.75 | 0.54 |  | -0.46 | -0.42 | 0.34 |
|  | [-1.50, 0.85] | [-1.40, 0.72] | [-2.00, 0.27] |  | [-1.50, 1.20] | [-0.31, 1.80] | [-0.63, 1.70] |  | [-1.60, 0.64] | [-1.50, 0.69] | [-0.88, 1.60] |
| Video - Con | -0.25 | -0.75 | -0.54 |  | 0.41 | 0.42 | -0.34 |  | 0.25 | 0.33 | 0.88 |
|  | [-1.40, 0.93] | [-1.80, 0.31] | [-1.70, 0.63] |  | [-1.00, 1.80] | [-0.69, 1.50] | [-1.60, 0.88] |  | [-0.79, 1.30] | [-0.72, 1.40] | [-0.27, 2.00] |
| Video - VR | 0.07 | -0.42 | 0.34 |  | 0.59 | -0.33 | -0.88 |  | 0.70 | 0.75 | 0.54 |
|  | [-1.20, 1.30] | [-1.50, 0.69] | [-0.88, 1.60] |  | [-0.74, 1.90] | [-1.40, 0.72] | [-2.00, 0.27] |  | [-0.35, 1.80] | [-0.31, 1.80] | [-0.63, 1.70] |
| ***Time1*** |  |  |  |  |  |  |  |  |  |  |  |
| Post - Base | 0.85 | 0.10 | 0.41 |  | 0.45 | 0.10 | 0.41 |  | 0.24 | 0.10 | 0.41 |
|  | [-0.13, 1.80] | [-0.77, 0.97] | [-0.58, 1.40] |  | [-0.56, 1.50] | [-0.77, 0.97] | [-0.58, 1.40] |  | [-0.58, 1.10] | [-0.77, 0.97] | [-0.58, 1.40] |
| Ret - Base | 0.39 | -0.36 | 0.12 |  | 0.16 | -0.36 | 0.12 |  | -0.26 | -0.36 | 0.12 |
|  | [-0.63, 1.40] | [-1.3, 0.55] | [-0.92, 1.20] |  | [-0.90, 1.20] | [-1.30, 0.55] | [-0.92, 1.20] |  | [-1.10, 0.60] | [-1.30, 0.55] | [-0.92, 1.20] |
| Ret - Post | -0.46 | -0.46 | -0.29 |  | -0.29 | -0.46 | -0.29 |  | -0.50 | -0.46 | -0.29 |
|  | [-1.50, 0.56] | [-1.40, 0.45] | [-1.30, 0.74] |  | [-1.40, 0.77] | [-1.40, 0.45] | [-1.30, 0.74] |  | [-1.40, 0.36] | [-1.40, 0.45] | [-1.30, 0.74] |
| ***Group * Time*** |  |  |  |  |  |  |  |  |  |  |  |
| VR * Post | 0.09 | -0.30 | -0.34 |  | -0.19 | 0.30 | 0.04 |  | 0.61 | 0.00 | 0.31 |
|  | [-1.80, 2.00] | [-2.00, 1.40] | [-2.30, 1.60] |  | [-2.30, 1.90] | [-1.50, 2.10] | [-2.00, 2.10] |  | [-1.10, 2.30] | [-1.80, 1.80] | [-1.80, 2.40] |
| Video * Post | -0.18 | -0.30 | -0.04 |  | 0.43 | 0.00 | -0.31 |  | 1.10 | 0.30 | 0.34 |
|  | [-2.20, 1.80] | [-2.10, 1.50] | [-2.10, 2.00] |  | [-1.70, 2.60] | [-1.80, 1.80] | [-2.40, 1.80] |  | [-0.52, 2.70] | [-1.40, 2.00] | [-1.60, 2.30] |
| VR * Ret | -0.68 | -0.57 | -0.89 |  | -0.11 | 0.46 | 0.41 |  | 0.69 | 0.11 | 0.48 |
|  | [-2.70, 1.4] | [-2.40, 1.30] | [-3.00, 1.20] |  | [-2.20, 2.00] | [-1.30, 2.30] | [-1.70, 2.50] |  | [-1.10, 2.50] | [-1.80, 2.00] | [-1.70, 2.70] |
| Video * Ret | -1.20 | -0.46 | -0.41 |  | -0.83 | -0.11 | -0.48 |  | 1.20 | 0.57 | 0.89 |
|  | [-3.20, 0.83] | [-2.30, 1.30] | [-2.50, 1.70] |  | [-3.10, 1.40] | [-2.00, 1.80] | [-2.70, 1.70] |  | [-0.56, 2.90] | [-1.30, 2.40] | [-1.20, 3.00] |
| **1** Base = Baseline, Post = Post-test, Ret = Retention  *Note*. Column values represent model coefficients with 95% Confidence intervals | | | | | | | | | | | |

Table 3. Descriptive Statistics for Gameplay Checks Measures

|  |  | Baseball | | Golf | | Tennis | |
| --- | --- | --- | --- | --- | --- | --- | --- |
|  |  | *N* | *M (SD)* | *N* | *M (SD)* | *N* | *M (SD)* |
| Ease | VR | 18 | 6.8 (2.3) | 20 | 8.0 (1.7) | 16 | 7.0 (2.8) |
| Video | 16 | 5.3 (3.1) * | 18 | 7.8 (1.9) | 20 | 6.4 (2.1) |
| Control | 20 | 8.3 (1.6) * | 16 | 7.7 (2.3) | 18 | 7.7 (2.5) |
| All | 54 | 6.9 (2.6) | 54 | 7.9 (1.9) | 54 | 7.0 (2.5) |
| Physical Effort | VR | 18 | 3.7 (2.8) | 20 | 3.3 (2.8) | 16 | 4.0 (3.1) * |
| Video | 16 | 1.8 (1.9) | 18 | 1.8 (1.7) | 20 | 1.1 (0.9) * |
| Control | 20 | 3.8 (2.5) | 16 | 3.7 (2.1) | 18 | 3.9 (2.7) * |
| All | 54 | 3.2 (2.5) | 54 | 2.9 (2.4) | 54 | 2.9 (2.7) |
| Mental Effort | VR | 18 | 4.7 (2.3) | 20 | 4.8 (2.5) | 16 | 4.3 (2.7) |
| Video | 16 | 5.4 (2.5) | 18 | 5.4 (2.6) | 20 | 5.2 (2.3) |
| Control | 20 | 5.6 (2.5) | 16 | 4.0 (3.0) | 18 | 5.6 (2.8) |
| All | 54 | 5.2 (2.4) | 54 | 4.8 (2.7) | 54 | 5.1 (2.6) |
| Complexity | VR | 18 | 4.5 (3.1) | 20 | 3.5 (2.3) | 16 | 3.5 (2.7) |
| Video | 16 | 5.3 (3.1) * | 18 | 3.7 (1.9) | 20 | 4.9 (2.8) * |
| Control | 20 | 2.8 (1.9) * | 16 | 2.6 (1.7) | 17 | 2.7 (2.2) * |
| All | 54 | 4.1 (2.9) | 54 | 3.3 (2.0) | 53 | 3.8 (2.7) |
| Competence | VR | 18 | 3.6 (2.9) | 20 | 4.7 (2.0) | 16 | 3.7 (2.8) |
| Video | 16 | 3.6 (2.7) | 18 | 5.7 (1.4) | 20 | 3.4 (2.8) |
| Control | 20 | 5.8 (3.2) | 16 | 5.1 (2.9) | 18 | 4.8 (2.7) |
| All | 54 | 4.4 (3.1) | 54 | 5.1 (2.2) | 54 | 3.9 (2.8) |
| Play Again | VR | 18 | 5.9 (2.1) | 20 | 7.4 (2.4) | 16 | 6.0 (2.9) |
| Video | 16 | 5.7 (2.6) | 18 | 7.6 (1.9) | 20 | 5.1 (2.8) * |
| Control | 20 | 7.6 (2.4) | 16 | 6.2 (3.0) | 18 | 7.6 (2.7) * |
| All | 54 | 6.5 (2.5) | 54 | 7.1 (2.5) | 54 | 6.2 (2.9) |

* denotes significance (see Gameplay Checks subsection of the Results in the manuscript)
